# Supplementary material for: Identification of drug candidates targeting monocyte reprogramming in people living with HIV
Source: PubMed Central journal article supplement (PMC10703486; doi:10.3389/fimmu.2023.1275136), 2023-11-20

# Figure S1

## A

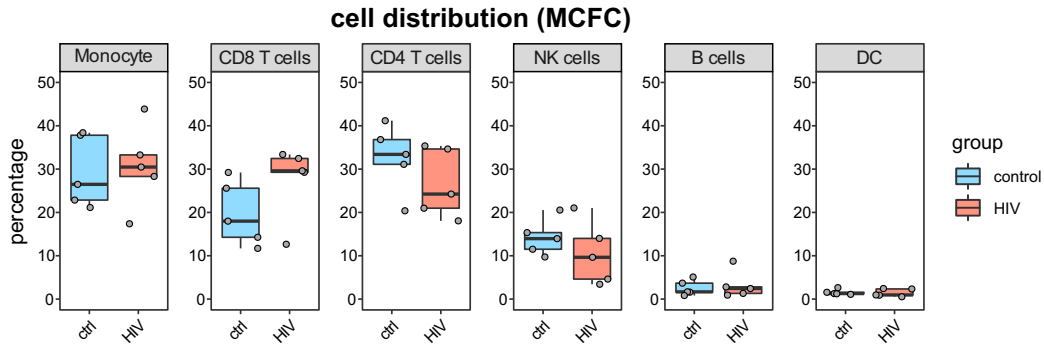

## B

**DEG HIV vs. Ctrl (bulk RNA PBMC)**

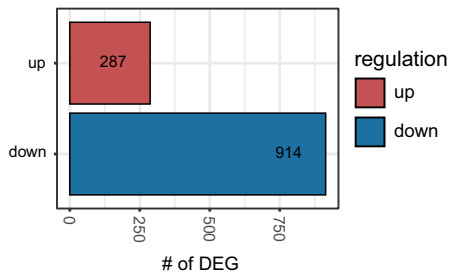

## C

**gene enrichment (GSVA) of DE heatmap clusters**

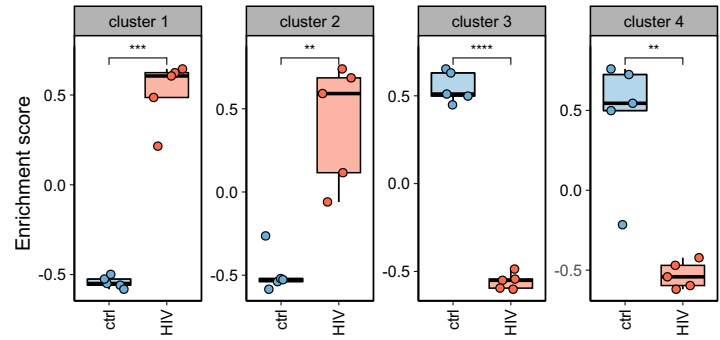

# Figure S2

**A**

## clinical marker (serum measurement)

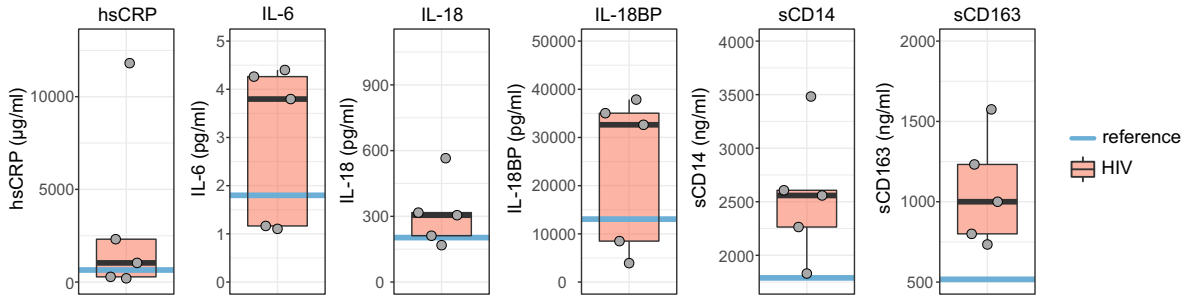

**B**

## CD14 MACS positive selection

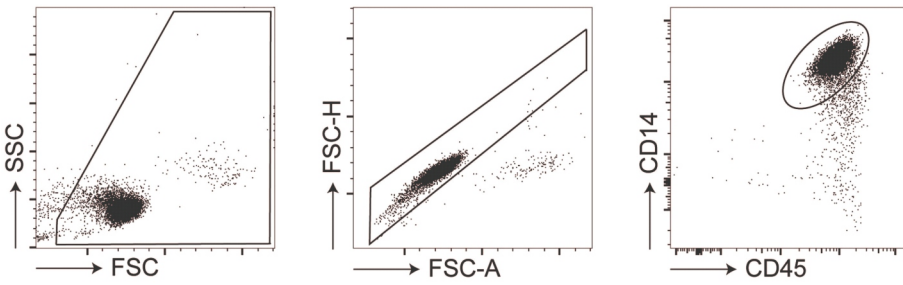

**C**

## DEG HIV vs. Ctrl (bulk RNA CD14)

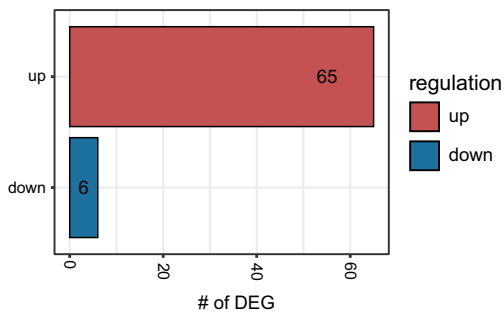

**D**

## selected genes (bulk RNA CD14)

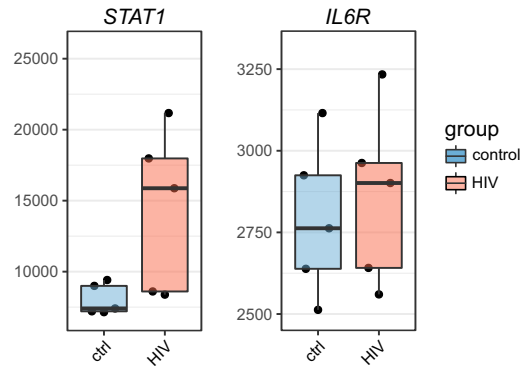

**E**

## DAR HIV vs. Ctrl (bulk ATAC CD14)

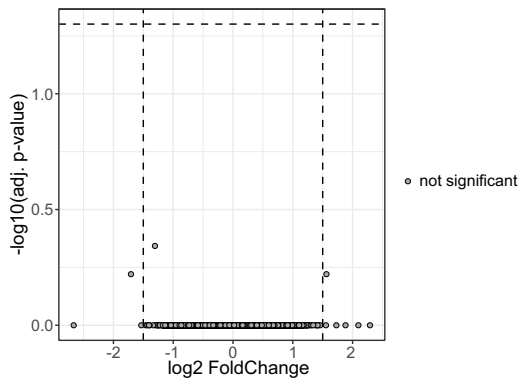

# Figure S3

## A cell type marker PLHIV (scRNAseq PBMC)

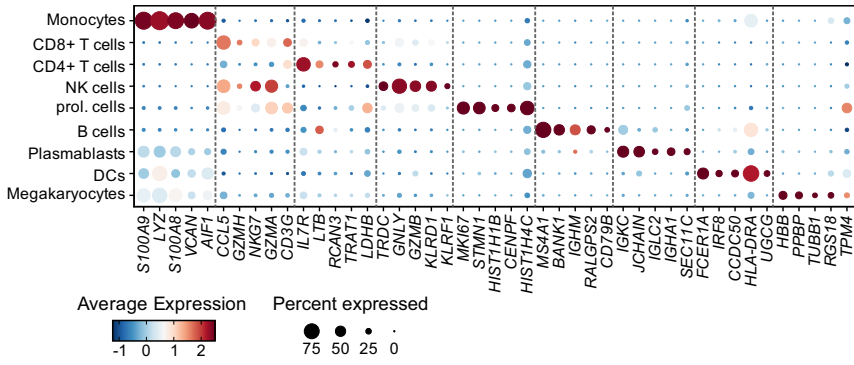

## B up-regulated DEG comparison monocytes (HIV vs ctrl.)

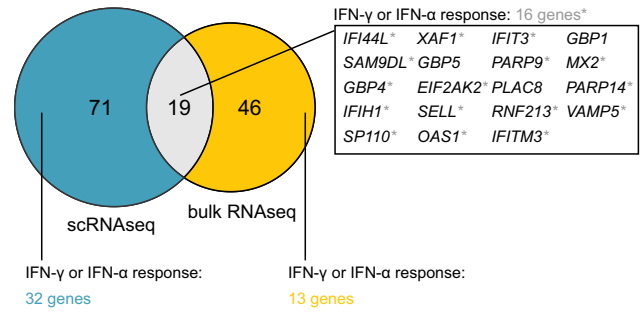

## C integrated PBMC by dataset

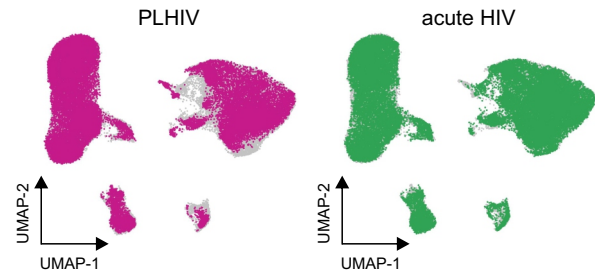

## D cell type marker integrated PBMC (PLHIV+acute HIV)

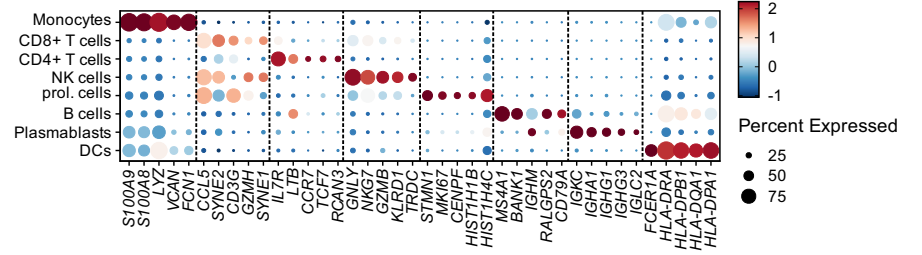

## E monocyte state marker (PLHIV+acute HIV)

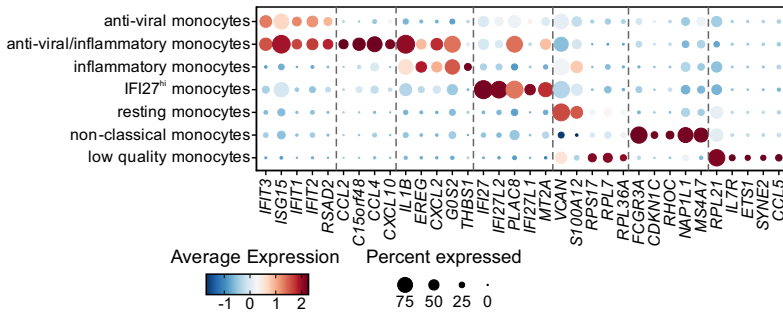

## F mapping up DEG to PBMC clusters

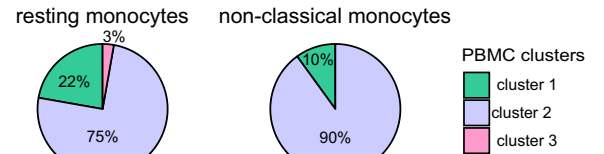

## G monocyte UMAP by PLHIV dataset donors

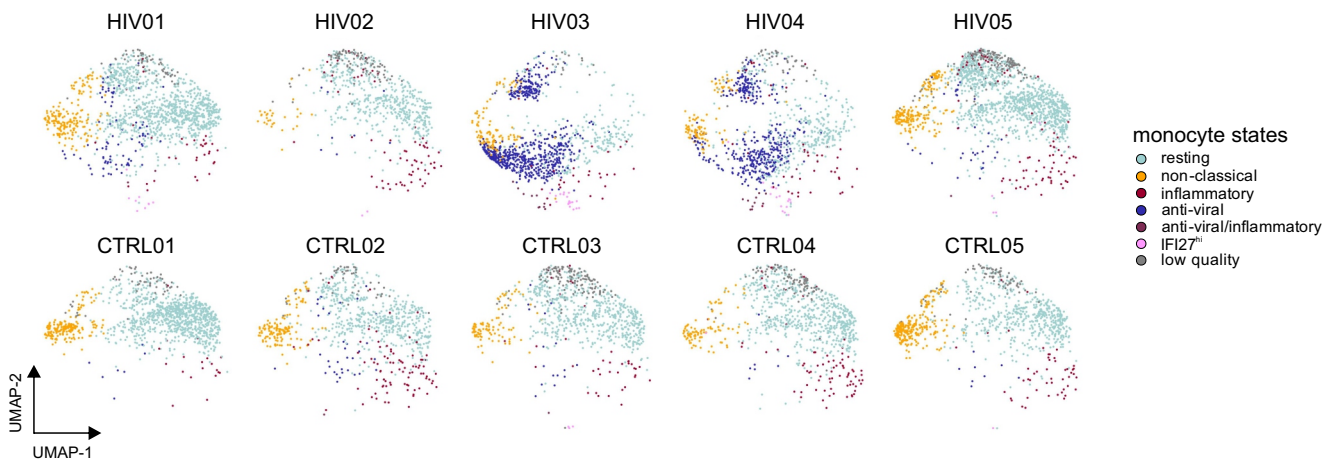

# Figure S4

A

cluster 43 reurring target genes in monocyte states (scRNAseq)

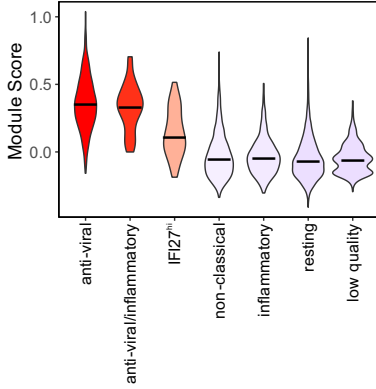

B

samples passing QC

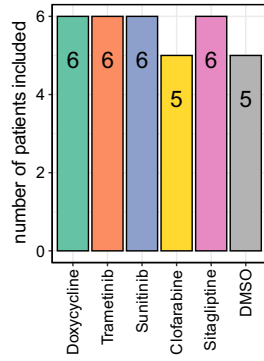

C

number of DEG for treatment vs DMSO

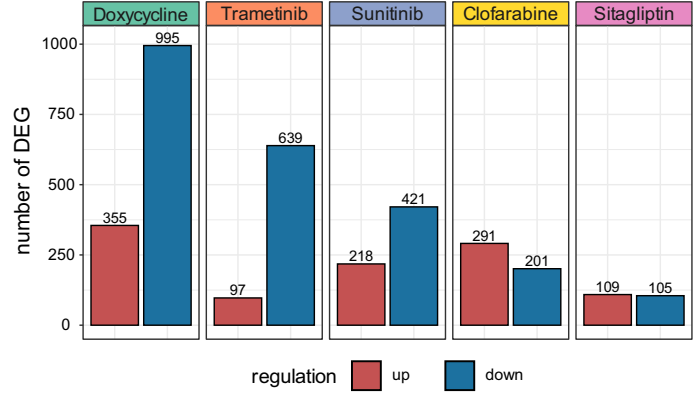

D

leading edge of gene signatures by treatment

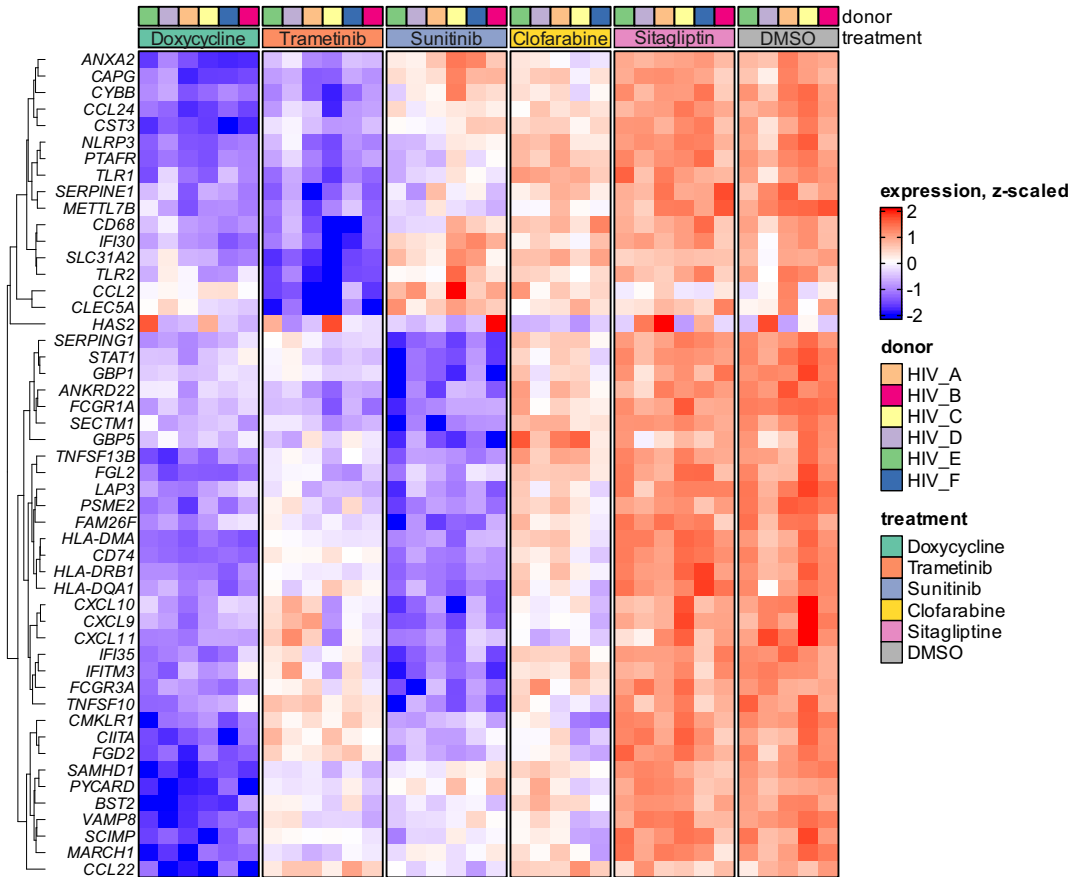

Supplement: DataSheet_1.pdf [file DataSheet_1.pdf]
